# Supplementary material
Source: HighWire-hosted journal article supplement (https://www.annfammed.org/highwire/filestream/16166/field_highwire_adjunct_files/0/Gold_Supp.pdf)
Supplement: Gold_Supp.pdf [file Gold_Supp.pdf]

## Supplemental materials for:

Gold KJ, Dobson ML, Sen A. "Three Good Things" digital intervention among health care workers: a randomized controlled trial. *Ann Fam Med*. 2023;21(3):220-226.

**Supplemental Table 1. Changes in Well-Being Over Time For Group A (Intervention, N = 116) and Group B (Wait-List Control, N = 107), Controlling For Gender, Age, and Role**

| Measure  | Group   | Mean Changes in Scores Over Time     |                                        |                                      | Interaction p-value (group A vs. B over time) |
|----------|---------|--------------------------------------|----------------------------------------|--------------------------------------|-----------------------------------------------|
|          |         | Month 0 to Month 1<br>(Mean, 95% CI) | Month 1 to Month 3<br>(Mean, 95% CI)   | Month 0 to Month 3<br>(Mean, 95% CI) |                                               |
| PHQ      | Group A | -0.50<br>(-1.06, 0.06)               | 0.27<br>(-0.31, 0.86)                  | -0.23<br>(-0.79, 0.34)               | 0.75                                          |
|          | Group B | -0.34<br>(-0.89, 0.20)               | -0.04<br>(-0.61, 0.53)                 | -0.38<br>(-0.95, 0.19)               |                                               |
| PANAS-SF | Group A | <b>2.18</b><br><b>(0.86, 3.50)*</b>  | <b>-1.40</b><br><b>(-2.77, -0.03)*</b> | 0.78<br>(-0.56, 2.12)                | <b>0.03*</b>                                  |
|          | Group B | 0.25<br>(-1.07, 1.57)                | 1.05<br>(-0.31, 2.42)                  | 1.30<br>(-0.03, 2.64)                |                                               |
| GRAT     | Group A | 0.43<br>(-0.03, 0.89)                | -0.44<br>(-0.92, 0.04)                 | -0.01<br>(-0.47, 0.46)               | 0.59                                          |
|          | Group B | 0.12<br>(-0.34, 0.57)                | -0.39<br>(-0.86, 0.07)                 | -0.28<br>(-0.75, 0.19)               |                                               |
| SAT      | Group A | -0.60<br>(-1.31, 0.12)               | 0.32<br>(-0.41, 1.05)                  | -0.28<br>(-1.0, 0.45)                | 0.97                                          |
|          | Group B | -0.49<br>(-1.19, 0.21)               | 0.20<br>(-0.53, 0.92)                  | -0.29<br>(-1.01, 0.43)               |                                               |

PHQ: Depression: Lower is less depression (range 0-27)

PANAS-SF: Positive/Negative Affect: Higher is more positive (range 10-50)

GRAT: Gratitude: Higher is more gratitude (range 3-15)

SAT: Satisfaction with Life: Higher is more satisfaction (range 5-35)

Differences are calculated as (values at later time – values at earlier time)

\*Statistically significant at 0.05 level

**Supplemental Table 2. Linear Mixed Model Showing Overall Effects By Role and Gender, Age, and Time**

**Table 2a: Overall effects by role and gender (mean, standard error)**

| Variables     |                       | Outcomes<br>Mean (SE) |              |               |                   |
|---------------|-----------------------|-----------------------|--------------|---------------|-------------------|
|               |                       | PHQ-9                 | PANAS-SF     | GRAT          | SAT               |
| <b>Role</b>   | <b>Administrative</b> | 4.18 (0.87)           | 33.20 (1.39) | 11.73 (0.46)  | 13.79 (1.05)      |
|               | <b>Clinical</b>       | 4.53 (0.69)           | 30.73 (1.09) | 10.62 (0.36)  | 14.57 (0.81)      |
|               | <b>Faculty</b>        | 3.38 (0.55)           | 33.68 (0.88) | 11.68 (0.29)  | 10.94 (0.66)      |
| p-value       | Admin. vs Clinical    | 0.69                  | 0.09         | <b>0.02*</b>  | 0.46              |
|               | Admin vs Faculty      | 0.39                  | 0.69         | 0.94          | <b>0.01*</b>      |
|               | Clinical vs. Faculty  | 0.13                  | <b>0.01*</b> | <b>0.008*</b> | <b>&lt;0.001*</b> |
| <b>Gender</b> | <b>Male</b>           | 3.67 (0.96)           | 33.09 (1.54) | 11.20 (0.51)  | 12.27 (1.15)      |
|               | <b>Female</b>         | 4.39 (0.36)           | 31.90 (0.57) | 11.48 (0.19)  | 13.93 (0.43)      |
| p-value       | Male vs. Female       | 0.48                  | 0.46         | 0.60          | 0.17              |

PHQ: Depression: Lower is less depression (range 0-27)

PANAS-SF: Positive/Negative Affect: Higher is more positive (range 10-50)

GRAT: Gratitude: Higher is more gratitude (range 3-15)

SAT: Satisfaction with Life: Higher is more satisfaction (range 5-35)

\*Statistically significant at 0.05 level

**Table 2b: PHQ-9 Depression outcomes over time by role, gender, and age (mean, standard error)**

| Variables     |                | Time        |             |             | p-values      |               |               |
|---------------|----------------|-------------|-------------|-------------|---------------|---------------|---------------|
|               |                | Baseline    | Early       | Late        | Base vs Early | Base vs Late  | Early vs Late |
| <b>Role</b>   | Administrative | 4.80 (0.93) | 3.97 (0.94) | 3.76 (0.95) | 0.16          | 0.08          | 0.74          |
|               | Clinical       | 5.05 (0.72) | 4.17 (0.74) | 4.35 (0.74) | 0.06          | 0.13          | 0.70          |
|               | Faculty        | 3.84 (0.59) | 2.91 (0.60) | 3.39 (0.60) | <b>0.013*</b> | 0.22          | 0.21          |
| <b>Gender</b> | Male           | 4.57 (1.02) | 3.38 (1.05) | 3.05 (1.04) | 0.07          | <b>0.012*</b> | 0.62          |
|               | Female         | 4.55 (0.38) | 3.99 (0.39) | 4.61 (0.39) | <b>0.02*</b>  | 0.81          | <b>0.01*</b>  |
| <b>Time</b>   | ---            | 4.56 (0.55) | 3.68 (0.56) | 3.83 (0.56) | <b>0.012*</b> | <b>0.035*</b> | 0.68          |

Age is statistically significantly associated with PHQ-9 (p-value = 0.018), with each year increase in age shown to be associated with 0.07 decrease in PHQ-9.

\*Statistically significant at 0.05 level

**Table 2c: PANAS-SF (Positive Affect) outcomes over time by role, gender, and age (mean, standard error)**

| Variables     |                | Time         |              |              | p-values      |              |               |
|---------------|----------------|--------------|--------------|--------------|---------------|--------------|---------------|
|               |                | Baseline     | Early        | Late         | Base vs Early | Base vs Late | Early vs Late |
| <b>Role</b>   | Administrative | 32.23 (1.60) | 34.78 (1.68) | 32.28 (1.69) | 0.10          | 0.97         | 0.11          |
|               | Clinical       | 29.99 (1.25) | 32.50 (1.33) | 29.66 (1.32) | <b>0.04*</b>  | 0.78         | <b>0.02*</b>  |
|               | Faculty        | 33.54 (1.02) | 34.08 (1.07) | 33.43 (1.05) | 0.58          | 0.90         | 0.51          |
| <b>Gender</b> | Male           | 32.83 (1.76) | 34.43 (1.88) | 32.013 (1.4) | 0.35          | 0.63         | 0.17          |
|               | Female         | 31.01 (0.66) | 33.14 (0.68) | 31.55 (0.69) | <b>0.001*</b> | 0.39         | <b>0.02*</b>  |
| <b>Time</b>   | ---            | 31.92 (0.95) | 33.79 (1.0)  | 31.79 (0.99) | <b>0.04*</b>  | 0.89         | <b>0.04*</b>  |

Age is statistically significantly associated with PANAS-SF (p-value = 0.008), with each year increase in age shown to be associated with 0.124 unit increase in the PANAS-SF score.

\*Statistically significant at 0.05 level

**Table 2d: GRAT (Gratitude) outcomes over time by role, gender, and age (mean, standard error)**

| Variables     |                | Time         |              |              | p-values          |              |               |
|---------------|----------------|--------------|--------------|--------------|-------------------|--------------|---------------|
|               |                | Baseline     | Early        | Late         | Base vs Early     | Base vs Late | Early vs Late |
| <b>Role</b>   | Administrative | 11.33 (0.52) | 12.27 (0.54) | 11.54 (0.54) | 0.05              | 0.67         | 0.13          |
|               | Clinical       | 10.35 (0.41) | 11.06 (0.43) | 10.45 (0.43) | 0.06              | 0.77         | 0.11          |
|               | Faculty        | 11.43 (0.33) | 11.94 (0.34) | 11.66 (0.34) | 0.10              | 0.44         | 0.38          |
| <b>Gender</b> | Male           | 10.91 (0.57) | 11.64 (0.60) | 11.04 (0.60) | 0.16              | 0.80         | 0.26          |
|               | Female         | 11.17 (0.21) | 11.87 (0.22) | 11.40 (0.22) | <b>&lt;0.001*</b> | 0.24         | <b>0.02</b>   |
| <b>Time</b>   | ---            | 11.04 (0.31) | 11.76 (0.32) | 11.22 (0.32) | <b>0.02*</b>      | 0.52         | 0.06          |

Age is borderline significantly associated with GRAT (p-value = 0.046), with each year increase in age shown to be associated with 0.03 unit increase in the GRAT score.

\*Statistically significant at 0.05 level

**Table 2e: SAT (Satisfaction with Life) outcomes over time by role, gender, and age (mean, standard error)**

| Variables     |                | Time         |              |              | p-values      |              |               |
|---------------|----------------|--------------|--------------|--------------|---------------|--------------|---------------|
|               |                | Baseline     | Early        | Late         | Base vs Early | Base vs Late | Early vs Late |
| <b>Role</b>   | Administrative | 13.99 (1.11) | 13.94 (1.13) | 12.79 (1.13) | 0.94          | 0.12         | 0.14          |
|               | Clinical       | 15.22 (0.87) | 14.10 (0.89) | 14.73 (0.89) | 0.07          | 0.42         | 0.31          |
|               | Faculty        | 11.04 (0.70) | 10.75 (0.72) | 10.95 (0.71) | 0.55          | 0.86         | 0.68          |
| <b>Gender</b> | Male           | 12.62 (1.22) | 12.16 (1.26) | 12.00 (1.25) | 0.60          | 0.47         | 0.85          |
|               | Female         | 14.22 (0.45) | 13.69 (0.46) | 13.65 (0.46) | 0.10          | 0.07         | 0.88          |
| <b>Time</b>   | ---            | 13.42 (0.66) | 12.93 (0.68) | 12.82 (0.67) | 0.29          | 0.19         | 0.82          |

Age is significantly associated with SAT (p-value = 0.029), with each year increase in age shown to be associated with 0.08 unit decrease in the SAT score.
